# Supplementary material for: Short-range amorphous carbon nanosheets for oxygen reduction electrocatalysis
Source: Royal Society of Chemistry journal article supplement (doi:10.1039/d0na00726a), 2020-01-01
Supplement: d0na00726a1.pdf [file d0na00726a1.pdf]

## Supporting Information

### **Short-range amorphous carbon nanosheets for oxygen reduction electrocatalysis**

Qingyu Li, Dingding Kong, Xinyi Zhao, Yezheng Cai\*, Zhaoling Ma\*, Youguo Huang,  
Hongqiang Wang

Guangxi Key Laboratory of Low Carbon Energy Materials, School of Chemistry and  
Pharmaceutical Sciences, Guangxi Normal University, Guilin, China.

\*Corresponding authors: 18810629627@163.com (Y. Cai); zhaolingma@163.com (Z. Ma)

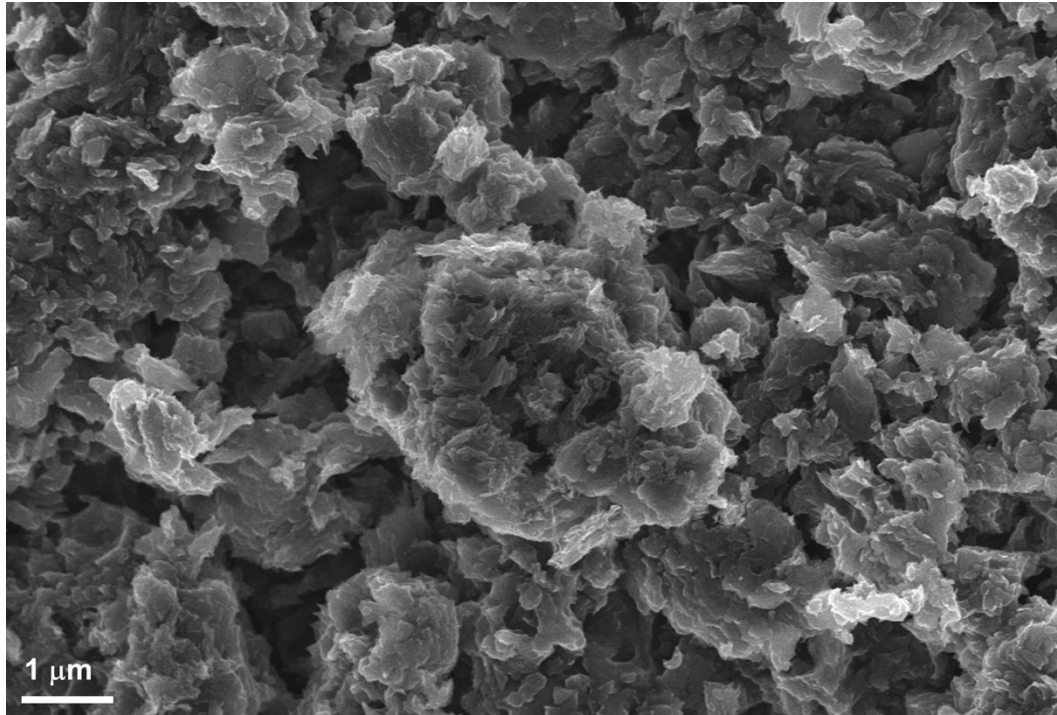

Fig. S1 SEM image of NCS.

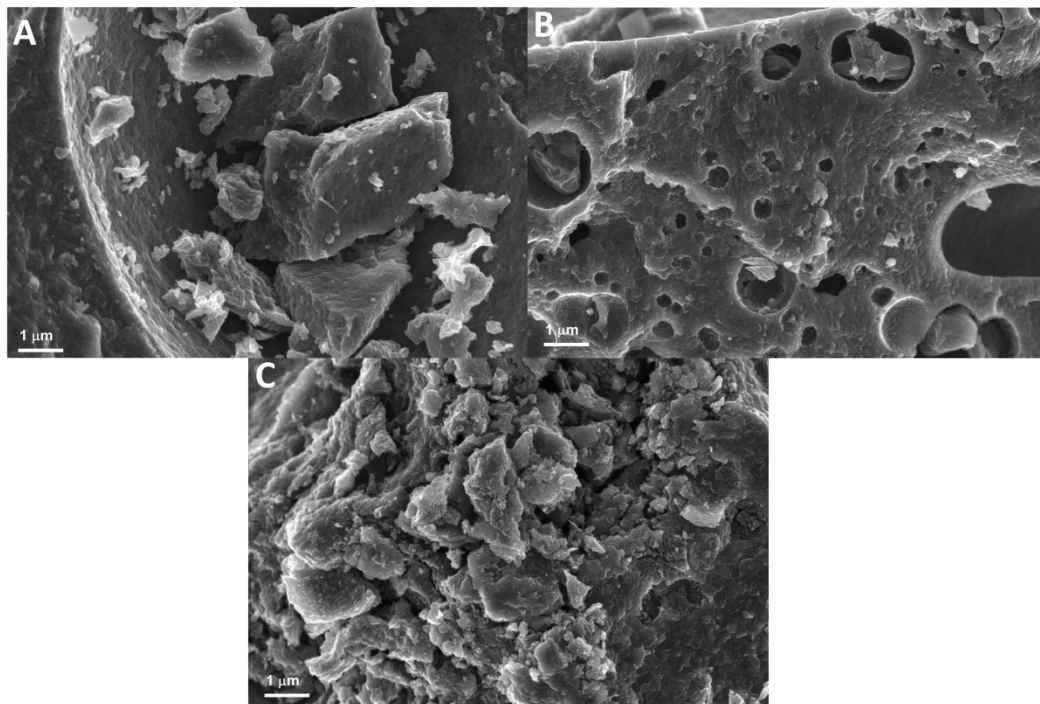

Fig. S2 SEM images of (A) BNC, (B) PBNC-600, and (C) PBNC-1000.

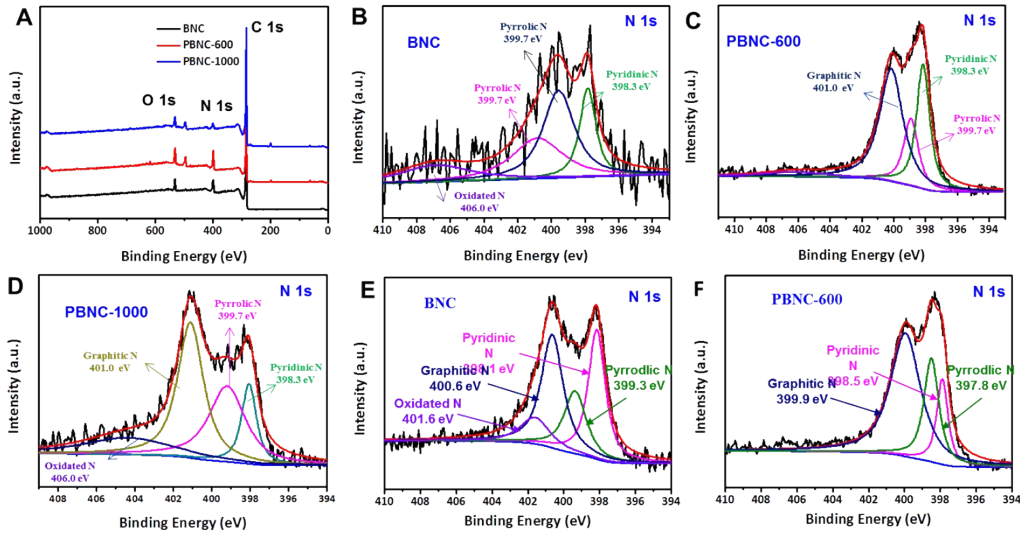

Fig. S3 (A) XPS survey scans and (B-F) high resolution N 1s XPS spectrum of BNC (B), PBNC-600 (C), PBNC-1000 (D), BNC (E), and PBNC (F).

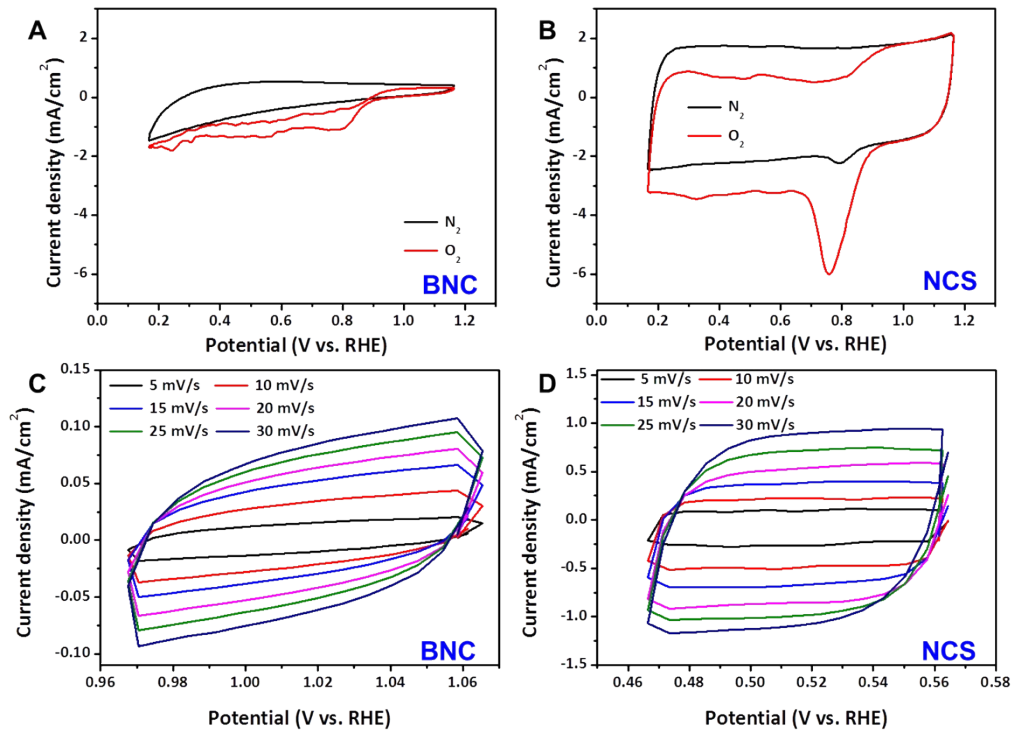

Fig. S4 (A-B) CV curves of BNC (A) and NCS (B) recorded in  $N_2$  or  $O_2$ -saturated 0.1 M KOH solution; (C-D) CV curves of BNC (C) and NCS (D) recorded in  $N_2$ -saturated 0.1 M KOH solution at different scan rates.

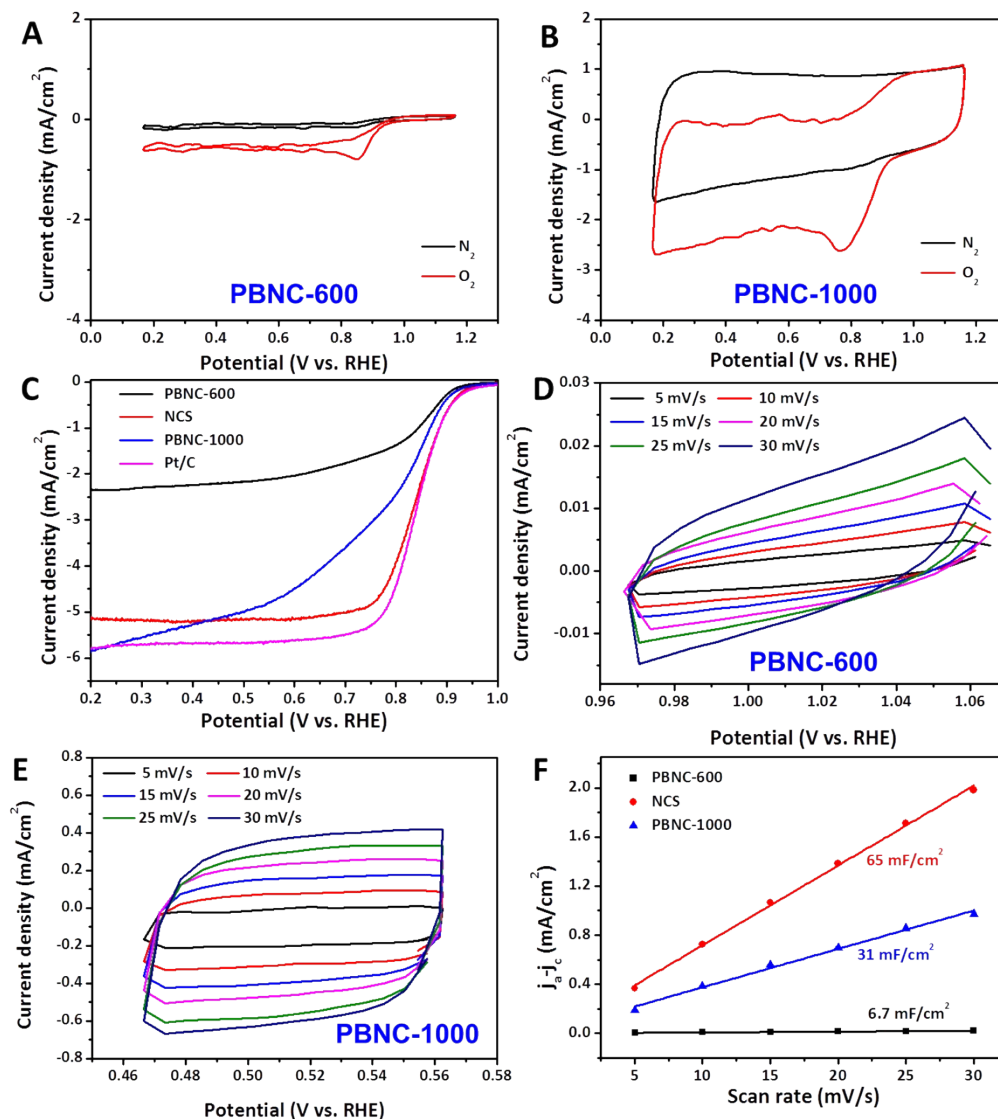

Fig. S5 (A-B) CV curves of PBNC-600 (A) and PBNC-1000 (B) recorded in  $N_2$  or  $O_2$ -saturated 0.1 M KOH solution; (C) LSV curves of PBNC-600, NCS, PBNC-1000 recorded in  $O_2$ -saturated 0.1 M KOH solution at a scan rate of 10 mV/s and a rotating speed of 1600 rpm; (D-F) CV curves of PBNC-600 (D) and PBNC-1000 (E) recorded in  $N_2$ -saturated 0.1 M KOH solution at different scan rates and the corresponding linear relationship (F) between capacitive ( $j_a-j_c$ ) and CV scan rates.

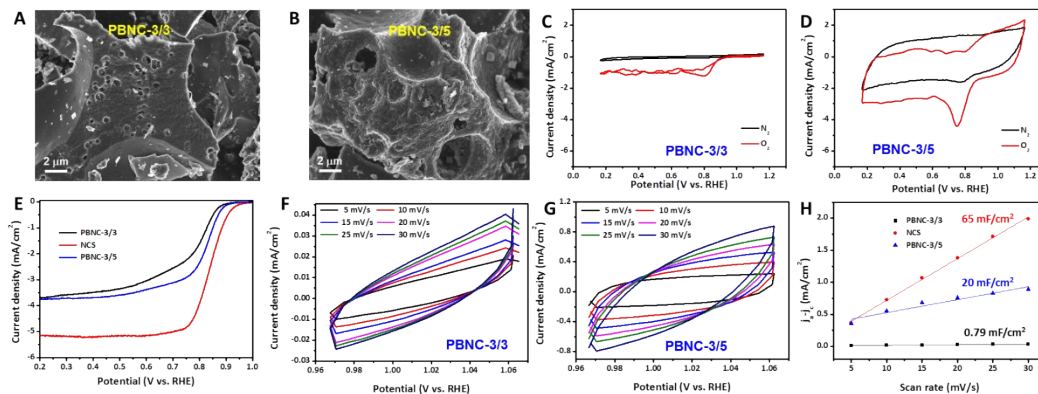

Fig. S6 (A, B) SEM images of PBNC-3/3 and PBNC-3/5; (C, D) CV curves of PBNC-3/3 and PBNC-3/5 recorded in  $N_2$  or  $O_2$ -saturated 0.1 M KOH solution; (E) LSV curves of PBNC-3/3, NCS, and PBNC-3/5 recorded in  $O_2$ -saturated 0.1 M KOH solution at a scan rate of 10 mV/s and a rotating speed of 1600 rpm; (F-H) CV curves of PBNC-3/3 and PBNC-3/5 recorded in  $N_2$ -saturated 0.1 M KOH solution at different scan rates and the corresponding linear relationship (H) between capacitive ( $j_{a-j_c}$ ) and CV scan rates.

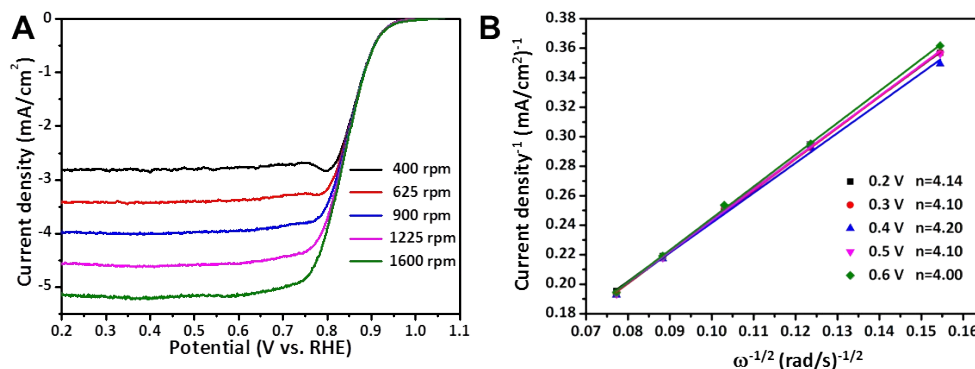

Fig. S7 (A) LSV curves of NCS recorded in  $O_2$ -saturated 0.1 M KOH solution at different rotating speeds and (B) the corresponding K-L plots.

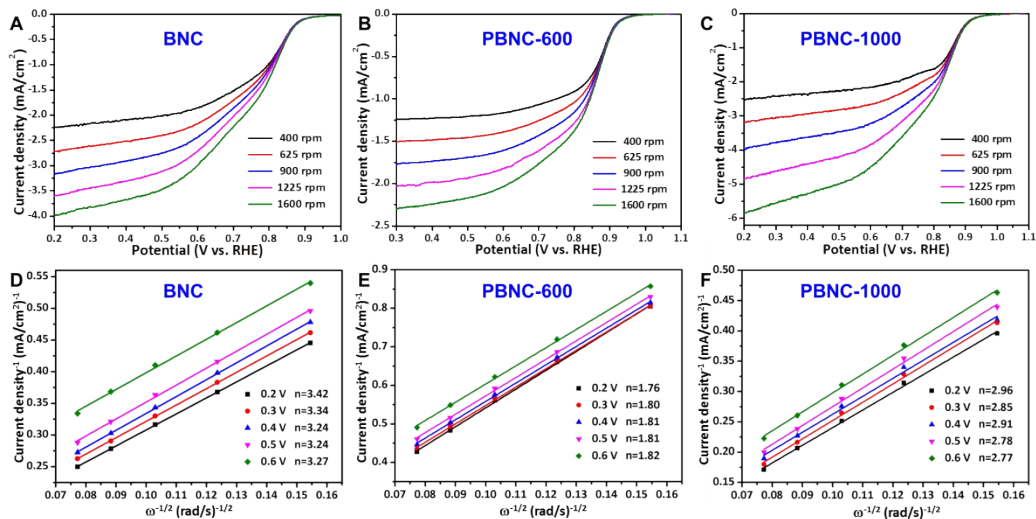

Fig. S8 LSV curves at different rotating speeds and the corresponding K-L plots of (A,D) BNC, (B,E) PBNC-600, and (C,F) PBNC-1000.

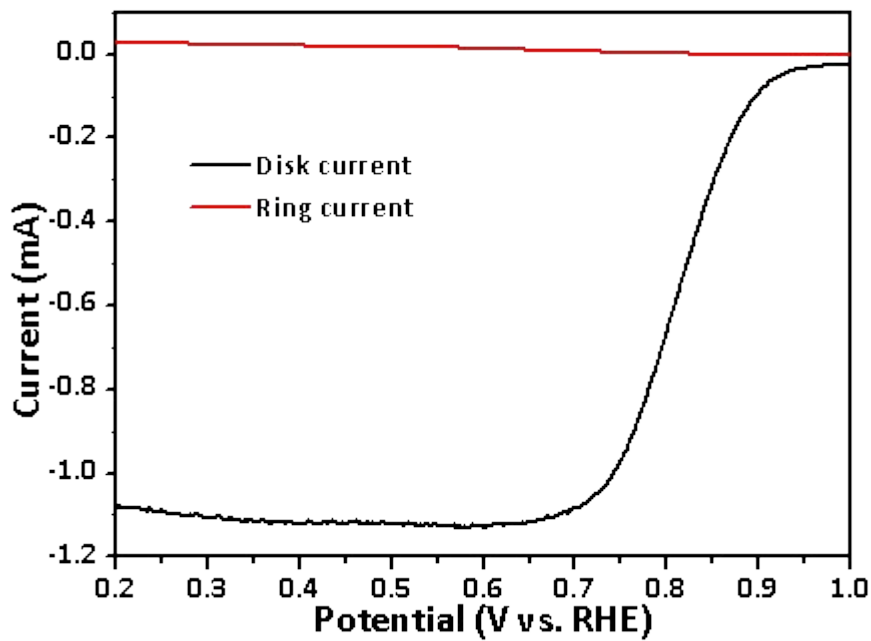

Fig. S9 RRDE curve of NCS recorded in  $O_2$ -saturated 0.1 M KOH solution at a scan rate of 10 mV/s and a rotating speed of 1600 rpm.

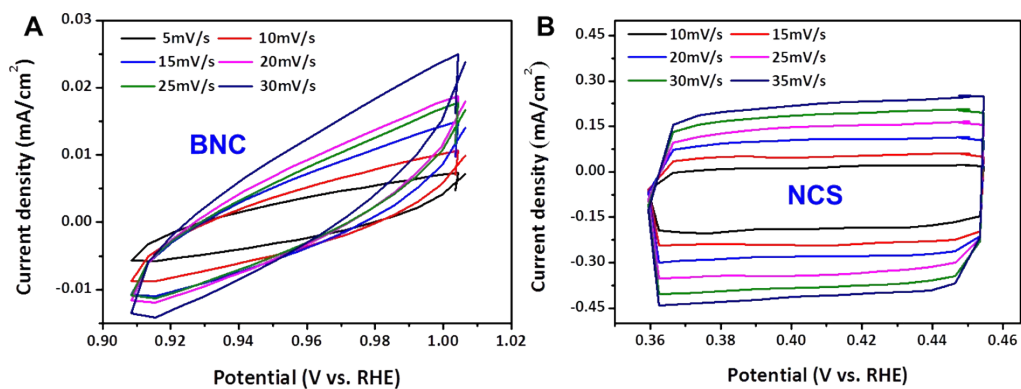

Fig. S10 CV curves of (A) BNC and (B) NCS recorded in  $N_2$ -saturated 0.1 M  $HClO_4$  solution at different scan rates.

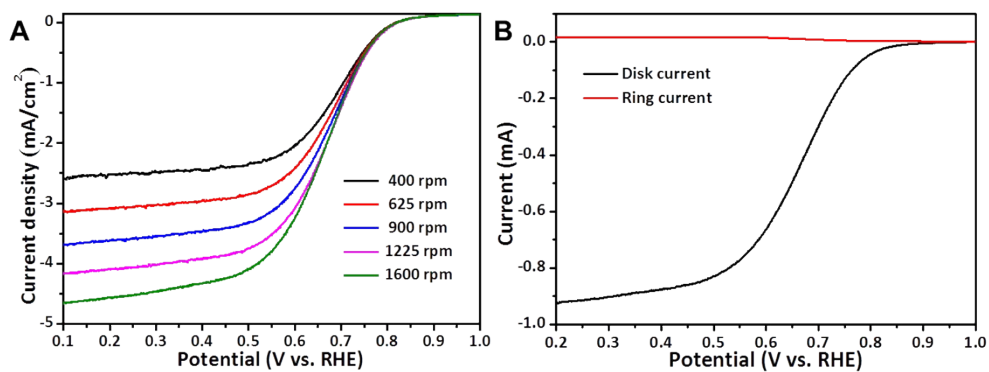

Fig. S11 (A) LSV curves recorded at different rotating speeds and (B) RRDE curve with a ring disk potential of 1.48 V of NCS in  $O_2$ -saturated 0.1 M  $HClO_4$  solution at a scan rate of 10  $mV/s$ .

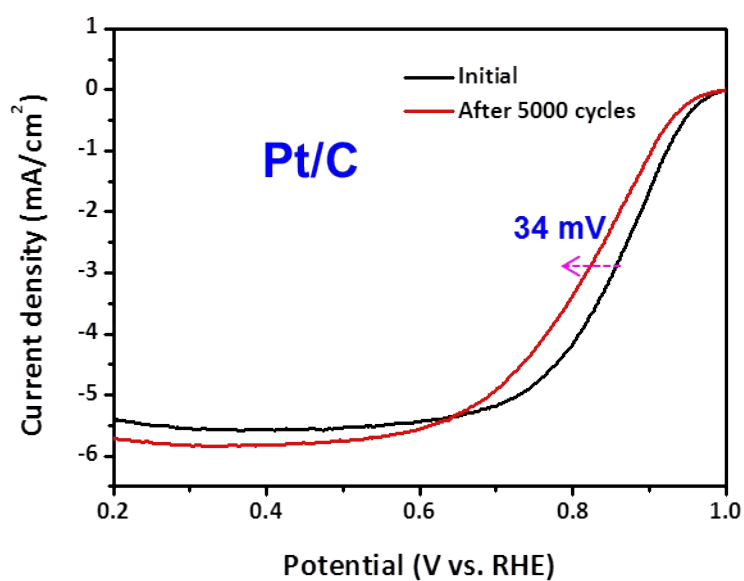

Fig. S12 LSV curves of commercial Pt/C before and after stability test of 5000 cycles.

Table S1 Surface composition of BNC, PBNC-600, NCS, and PBNC-1000.

| Samples   | Atomic ratio (%) |       |      |
|-----------|------------------|-------|------|
|           | C                | N     | O    |
| BNC       | 89.25            | 10.93 | 6.12 |
| PBNC-600  | 74.67            | 15.52 | 9.81 |
| NCS       | 90.5             | 4.93  | 4.57 |
| PBNC-1000 | 90.11            | 4.48  | 5.41 |



Table S2  $E_{1/2}$  value comparison of NCS and the reported metal-free carbon electrocatalysts in alkaline medium.

| Electrocatalyst               | Electrolyte      | $E_{1/2}$ (V) | Reference        |
|-------------------------------|------------------|---------------|------------------|
| <b>NCS</b>                    | <b>0.1 M KOH</b> | <b>0.832</b>  | <b>This work</b> |
| GNF-H/N (1:20)                | 0.1 M KOH        | 0.83          | 1                |
| N-GPp                         | 0.1 M KOH        | 0.83          | 2                |
| N,P-HCS                       | 0.1 M KOH        | 0.81          | 3                |
| BN-CA-900                     | 0.1 M KOH        | 0.77          | 4                |
| NCN-1000-5                    | 0.1 M KOH        | 0.82          | 5                |
| N-CNSP                        | 0.1 M KOH        | 0.85          | 6                |
| SWCNTs                        | 0.1 M KOH        | 0.80          | 7                |
| JUC-528                       | 0.1 M KOH        | 0.70          | 8                |
| PS-900                        | 0.1 M KOH        | 0.85          | 9                |
| N,S-CD/rGO                    | 0.1 M KOH        | 0.69          | 10               |
| GC-900                        | 0.1 M KOH        | 0.808         | 11               |
| C 4 NNSs/G,                   | 0.1 M KOH        | ~0.75         | 12               |
| N,S-HPC                       | 0.1 M KOH        | 0.814         | 13               |
| CF-hydrolyzed PIM-1           | 0.1 M KOH        | 0.847         | 14               |
| XWB-CMP-1000                  | 0.1 M KOH        | 0.774         | 15               |
| C-CMPs-1NP                    | 0.1 M KOH        | 0.82          | 16               |
| N, F-MCFs                     | 0.1 M KOH        | 0.81          | 17               |
| NPC                           | 0.1 M KOH        | 0.864         | 18               |
| GNR@CNT                       | 0.1 M KOH        | 0.819         | 19               |
| C <sub>3</sub> N <sub>7</sub> | 0.1 M KOH        | ~0.65         | 20               |

Table S3  $E_{1/2}$  value comparison of NCS and the reported metal-free carbon electrocatalysts in acidic medium.

| Electrocatalysts | Electrolyte                          | $E_{1/2}$ (V) | Reference        |
|------------------|--------------------------------------|---------------|------------------|
| <b>NCS</b>       | <b>0.1 M HClO<sub>4</sub></b>        | <b>0.64</b>   | <b>This work</b> |
| N, P-GC-1000     | 0.1 M HClO <sub>4</sub>              | 0.64          | 21               |
| NCN-1000-5       | 0.5 M H <sub>2</sub> SO <sub>4</sub> | ~0.58         | 5                |
| PS-900           | 0.5 M H <sub>2</sub> SO <sub>4</sub> | 0.70          | 9                |
| XWB-CMP-1000     | 0.5 M H <sub>2</sub> SO <sub>4</sub> | ~0.62         | 15               |
| N, F-MCFs        | 0.5 M H <sub>2</sub> SO <sub>4</sub> | 0.257         | 17               |
| NPC              | 0.5 M H <sub>2</sub> SO <sub>4</sub> | 0.74          | 18               |
| GNR@CNT          | 0.5 M H <sub>2</sub> SO <sub>4</sub> | 0.633         | 19               |
| ZnCoNC-IL20      | 0.1 M HClO <sub>4</sub>              | ~0.65         | 22               |
| MoN              | 0.1 M HClO <sub>4</sub>              | ~0.38         | 23               |
| T <sub>3</sub>   | 0.1 M HClO <sub>4</sub>              | ~0.41         | 24               |

## References

1. S. Akula and A. K. Sahu, *ACS Appl. Mater. Interfaces*, 2020, **12**, 11438-11449.
2. N. Komba, Q. Wei, G. Zhang, F. Rosei and S. Sun, *Appl. Catal. B-Environ.*, 2019, **243**, 373-380.
3. C. Zhang, L. Hou, C. Cheng, Z. Zhuang, F. Zheng and W. Chen, *ChemElectroChem*, 2018, **5**, 1891-1898.
4. J. Yu, C. Wang, W. Yuan, Y. Shen and A. Xie, *Chem. Eur.J.*, 2019, **25**, 2877-2883.
5. H. Jiang, J. Gu, X. Zheng, M. Liu, X. Qiu, L. Wang, W. Li, Z. Chen, X. Ji and J. Li, *Energy Environ. Sci.*, 2019, **12**, 322-333.
6. L. Zong, W. Wu, S. Liu, H. Yin, Y. Chen, C. Liu, K. Fan, X. Zhao, X. Chen, F. Wang, Y. Yang, L. Wang and S. Feng, *Energy Storage Mater.*, 2020, **27**, 514-521.
7. R. Gao, Q. Dai, F. Du, D. Yan and L. Dai, *J. Am. Chem. Soc.*, 2019, **141**, 11658-11666.
8. D. Li, C. Li, L. Zhang, H. Li, L. Zhu, D. Yang, Q. Fang, S. Qiu and X. Yao, *J. Am. Chem. Soc.*, 2020, **142**, 8104-8108.
9. L. Yu, C. Yang, W. Zhang, W. Liu, H. Wang, J. Qi and L. Xu, *J. Colloid Interface Sci.*, 2020, **575**, 406-415.
10. P. Zhang, J. S. Wei, X. B. Chen and H. M. Xiong, *J. Colloid Interface Sci.*, 2019, **537**, 716-724.
11. C. Maouche, Y. Zhou, B. Li, C. Cheng, Y. Wu, J. Li, S. Gao and J. Yang, *J. Electroanal. Chem.*, 2019, **853**, 113536-113543.
12. Y. Li, C. Mo, J. Li and D. Yu, *J. Energy Chem.*, 2020, **49**, 243-247.
13. J. Zhang, J. He, H. Zheng, R. Li and X. Gou, *J. Mater. Sci.*, 2020, **55**, 7464-7476.
14. B. Patil, B. Satilmis and T. Uyar, *J. Power Sources*, 2020, **451**, 227799-227808.
15. S.-B. Ren, X.-L. Chen, P.-X. Li, D.-Y. Hu, H.-L. Liu, W. Chen, W.-B. Xie, Y. Chen, X.-L. Yang, D.-M. Han, G.-H. Ning and X.-H. Xia, *J. Power Sources*, 2020, **461**, 228145-228150.
16. R. Jiao, W. Zhang, H. Sun, Z. Zhu, Z. Yang, W. Liang and A. Li, *Mater. Today Energy*, 2020, **16**, 100382.
17. T. Gong, R. Qi, X. Liu, H. Li and Y. Zhang, *Nano-Micro Lett.*, 2019, **11**, 9-19.
18. H. Han, Y. Noh, Y. Kim, W. S. Jung, S. Park and W. B. Kim, *Nanoscale*, 2019, **11**, 2423-2433.
19. L. Xue, Y. Li, X. Liu, Q. Liu, J. Shang, H. Duan, L. Dai and J. Shui, *Nat. Commun.*, 2018, **9**, 3819-3826.
20. I. Y. Kim, S. Kim, S. Premkumar, J. H. Yang, S. Umopathy and A. Vinu, *Small*, 2019, DOI: 10.1002/smll.201903572, 1903572-1903578.
21. Z. Zhou, A. Chen, X. Fan, A. Kong and Y. Shan, *Appl. Surf. Sci.*, 2019, **464**, 380-387.
22. M. Wang, H. Zhang, G. Thirunavukkarasu, I. Salam, J. R. Varcoe, P. Mardle, X. Li, S. Mu and S. Du, *ACS Energy Lett.*, 2019, **4**, 2104-2110.
23. M. E. Kreider, M. B. Stevens, Y. Liu, A. M. Patel, M. J. Statt, B. M. Gibbons, A. Gallo, M. Ben-Naim, A. Mehta, R. C. Davis, A. V. Ievlev, J. K. Nørskov, R. Sinclair, L. A. King and T. F. Jaramillo, *Chem. Mater.*, 2020, **32**, 2946-2960.
24. G. Zhang, D. Sebastián, X. Zhang, Q. Wei, C. Lo Vecchio, J. Zhang, V. Baglio, W. Wang, S. Sun, A. S. Aricò and A. C. Tavares, *Adv. Energy Mater.*, 2020, **10**, 2000075-2000085.
